# Supplementary material
Source: publisher figshare collection journal article supplement (https://asha.figshare.com/articles/dataset/_/15152370)
Supplement: Supplementary file 1 [file 1]

**Supplemental Material S1.** Individual effect sizes.

| Study name                                            | Statistics for each study |                |          |             |             |                |                  | Weight |
|-------------------------------------------------------|---------------------------|----------------|----------|-------------|-------------|----------------|------------------|--------|
|                                                       | Hedges's <i>g</i>         | Standard error | Variance | Lower limit | Upper limit | <i>z</i> value | <i>p</i> value   |        |
| Weismer & al. (2000)                                  | 0.68                      | 0.12           | 0.01     | 0.44        | 0.93        | 5.47           | <i>p</i> < 0.001 | 2.12   |
| Rodekohr & Haynes (2001)<br><i>White population</i>   | 1.19                      | 0.46           | 0.21     | 0.27        | 2.11        | 2.55           | <i>p</i> = 0.01  | 1.38   |
| Rodekohr & Haynes (2001)<br><i>African population</i> | 0.74                      | 0.44           | 0.19     | -0.12       | 1.61        | 1.66           | <i>p</i> = 0.09  | 1.43   |
| Conti-Ramsden (2003)                                  | 2.04                      | 0.30           | 0.09     | 1.44        | 2.64        | 6.68           | <i>p</i> < 0.001 | 1.76   |
| Conti-Ramsden & Hesketh (2003)                        | 1.22                      | 0.27           | 0.07     | 0.69        | 1.75        | 4.53           | <i>p</i> < 0.001 | 1.83   |
| Gray (2003)<br><i>Time 1</i>                          | 3.68                      | 0.49           | 0.24     | 2.71        | 4.64        | 7.48           | <i>p</i> < 0.001 | 1.33   |
| Gray (2003)<br><i>Time 2</i>                          | 2.80                      | 0.42           | 0.17     | 1.97        | 3.62        | 6.66           | <i>p</i> < 0.001 | 1.49   |
| Gray (2003)<br><i>Time 3</i>                          | 2.55                      | 0.40           | 0.16     | 1.76        | 3.34        | 6.34           | <i>p</i> < 0.001 | 1.53   |
| Gray (2004)                                           | 1.99                      | 0.38           | 0.14     | 1.24        | 2.73        | 5.21           | <i>p</i> < 0.001 | 1.58   |
| Horovov & Oetting (2004)                              | 2.15                      | 0.35           | 0.12     | 1.46        | 2.84        | 6.12           | <i>p</i> < 0.001 | 1.65   |
| Bortolini & al. (2006)                                | 1.26                      | 0.45           | 0.20     | 0.38        | 2.15        | 2.80           | <i>p</i> < 0.001 | 1.41   |
| Gray (2006)<br><i>3 years</i>                         | 1.37                      | 0.39           | 0.15     | 0.59        | 2.15        | 3.46           | <i>p</i> < 0.001 | 1.54   |
| Gray (2006)<br><i>4 years</i>                         | 0.89                      | 0.47           | 0.22     | -0.02       | 1.82        | 1.90           | <i>p</i> = 0.05  | 1.37   |
| Gray (2006)<br><i>5 years</i>                         | 0.95                      | 0.38           | 0.15     | 0.18        | 1.71        | 2.44           | <i>p</i> = 0.01  | 1.56   |
| Gray (2006)<br><i>6 years</i>                         | 1.07                      | 0.38           | 0.14     | 0.32        | 1.82        | 2.82           | <i>p</i> < 0.001 | 1.58   |
| Oetting & Cleveland (2006)                            | 1.73                      | 0.30           | 0.09     | 1.13        | 2.33        | 5.65           | <i>p</i> < 0.001 | 1.76   |

| Study name                                                       | Statistics for each study |                   |          |                |                |      | z value     | p value | Weight |
|------------------------------------------------------------------|---------------------------|-------------------|----------|----------------|----------------|------|-------------|---------|--------|
|                                                                  | Hedges's<br>g             | Standard<br>error | Variance | Lower<br>limit | Upper<br>limit |      |             |         |        |
| Oetting & al. (2008)<br><i>White population</i>                  | 1.97                      | 0.43              | 0.18     | 1.13           | 2.82           | 4.58 | $p < 0.001$ | 1.46    |        |
| Oetting & al. (2008)<br><i>African American population</i>       | 1.17                      | 0.46              | 0.21     | 0.26           | 2.07           | 2.53 | $p = 0.01$  | 1.40    |        |
| Jones & al. (2010)<br><i>Low lexicality nonwords</i>             | 1.72                      | 0.38              | 0.14     | 0.97           | 2.47           | 4.48 | $p < 0.001$ | 1.57    |        |
| Jones & al. (2010)<br><i>High lexicality nonwords</i>            | 1.53                      | 0.37              | 0.13     | 0.80           | 2.26           | 4.11 | $p < 0.001$ | 1.60    |        |
| Deevy & al. (2010)                                               | 2.27                      | 0.29              | 0.08     | 1.69           | 2.86           | 7.64 | $p < 0.001$ | 1.78    |        |
| Gutiérrez-Clellen & Simon-Cerejido (2010)<br><i>English task</i> | 1.38                      | 0.19              | 0.03     | 1.00           | 1.76           | 7.16 | $p < 0.001$ | 2.01    |        |
| Gutiérrez-Clellen & Simon-Cerejido (2010)<br><i>Spanish task</i> | 1.16                      | 0.18              | 0.03     | 0.79           | 1.53           | 6.19 | $p < 0.001$ | 2.02    |        |
| Thordardottir & al. (2011)                                       | 3.77                      | 0.40              | 0.16     | 2.98           | 4.55           | 9.42 | $p < 0.001$ | 1.54    |        |
| Petrucci & al. (2012)                                            | 0.91                      | 0.24              | 0.05     | 0.43           | 1.38           | 3.74 | $p < 0.001$ | 1.90    |        |
| Kapalková & al. (2013)                                           | 2.47                      | 0.46              | 0.21     | 1.56           | 3.37           | 5.34 | $p < 0.001$ | 1.39    |        |
| McKean & al. (2013)<br><i>High phonological probability</i>      | 1.82                      | 0.36              | 0.13     | 1.10           | 2.54           | 4.98 | $p < 0.001$ | 1.62    |        |
| McKean & al. (2013)<br><i>Low phonological probability</i>       | 1.43                      | 0.34              | 0.12     | 0.75           | 2.12           | 4.12 | $p < 0.001$ | 1.66    |        |
| Guiberson & Rodríguez (2013)<br><i>3 years</i>                   | 0.52                      | 0.52              | 0.27     | -0.50          | 1.56           | 0.99 | $p = 0.31$  | 1.25    |        |
| Guiberson & Rodríguez (2013)<br><i>4 years</i>                   | 0.546                     | 0.48              | 0.23     | -0.39          | 1.49           | 1.13 | $p = 0.25$  | 1.35    |        |
| Guiberson & Rodríguez (2013)<br><i>5 years</i>                   | 1.33                      | 0.55              | 0.30     | 0.25           | 2.42           | 2.41 | $p = 0.01$  | 1.20    |        |
| Dispaldro & al. (2013)                                           | 3.33                      | 0.52              | 0.27     | 2.30           | 4.36           | 6.35 | $p < 0.001$ | 1.26    |        |

| Study name                                                            | Statistics for each study |                |          |             |             |                |                  | Weight |
|-----------------------------------------------------------------------|---------------------------|----------------|----------|-------------|-------------|----------------|------------------|--------|
|                                                                       | Hedges's <i>g</i>         | Standard error | Variance | Lower limit | Upper limit | <i>z</i> value | <i>p</i> value   |        |
| Paradis & al. (2013)                                                  | 1.06                      | 0.21           | 0.04     | 0.63        | 1.49        | 4.87           | <i>p</i> < 0.001 | 1.95   |
| Stokes & al. (2013)                                                   | 0.69                      | 0.32           | 0.10     | 0.06        | 1.33        | 2.12           | <i>p</i> = 0.03  | 1.71   |
| Thordardottir & Brandeker (2013)                                      | 0.48                      | 0.26           | 0.07     | -0.04       | 1.00        | 1.80           | <i>p</i> = 0.07  | 1.85   |
| Guiberson & Rodríguez (2015)<br><i>Younger children</i>               | 0.67                      | 0.38           | 0.14     | -0.07       | 1.42        | 1.76           | <i>p</i> = 0.07  | 1.58   |
| Guiberson & Rodríguez (2015)<br><i>Older children</i>                 | 0.96                      | 0.38           | 0.15     | 0.20        | 1.72        | 2.48           | <i>p</i> = 0.01  | 1.56   |
| Boerma & al. (2015)<br><i>Monolinguals/Dutch task</i>                 | 2.09                      | 0.31           | 0.10     | 1.46        | 2.71        | 6.56           | <i>p</i> < 0.001 | 1.73   |
| Boerma & al. (2015)<br><i>Monolinguals/Quasi-Universal task</i>       | 2.47                      | 0.34           | 0.11     | 1.80        | 3.13        | 7.26           | <i>p</i> < 0.001 | 1.68   |
| Boerma & al. (2015)<br><i>Bilinguals/Dutch task</i>                   | 1.76                      | 0.30           | 0.09     | 1.17        | 2.35        | 5.85           | <i>p</i> < 0.001 | 1.77   |
| Boerma & al. (2015)<br><i>Bilinguals/Quasi-Universal task</i>         | 1.18                      | 0.27           | 0.07     | 0.64        | 1.73        | 4.28           | <i>p</i> < 0.001 | 1.83   |
| Ferré & Dos Santos (2015)<br><i>Monolinguals/language dependent</i>   | 2.41                      | 0.53           | 0.28     | 1.37        | 3.45        | 4.54           | <i>p</i> < 0.001 | 1.25   |
| Ferré & Dos Santos (2015)<br><i>Monolinguals/language independent</i> | 1.80                      | 0.47           | 0.22     | 0.87        | 2.74        | 3.78           | <i>p</i> < 0.001 | 1.36   |
| Ferré & Dos Santos (2015)<br><i>Bilinguals/language dependent</i>     | 1.06                      | 0.37           | 0.13     | 0.34        | 1.79        | 2.87           | <i>p</i> < 0.001 | 1.60   |
| Ferré & Dos Santos (2015)<br><i>Bilinguals/language independant</i>   | 0.85                      | 0.33           | 0.11     | 0.19        | 1.52        | 2.52           | <i>p</i> = 0.01  | 1.68   |
| Armon-Lotem & Meir (2016)<br><i>Monolinguals/Russian task</i>         | 2.16                      | 0.28           | 0.07     | 1.60        | 2.71        | 7.68           | <i>p</i> < 0.001 | 1.82   |
| Armon-Lotem & Meir (2016)<br><i>Monolinguals/Hebrew task</i>          | 1.23                      | 0.24           | 0.06     | 0.75        | 1.72        | 5.02           | <i>p</i> < 0.001 | 1.89   |

| Study name                                                   | Statistics for each study |                |             |             |             |                |                            | Weight |
|--------------------------------------------------------------|---------------------------|----------------|-------------|-------------|-------------|----------------|----------------------------|--------|
|                                                              | Hedges's <i>g</i>         | Standard error | Variance    | Lower limit | Upper limit | <i>z</i> value | <i>p</i> value             |        |
| Armon-Lotem & Meir (2016)<br><i>Bilinguals/Russian task</i>  | 0.96                      | 0.17           | 0.03        | 0.62        | 1.30        | 5.52           | <i>p</i> < 0.001           | 2.04   |
| Armon-Lotem & Meir (2016)<br><i>Bilinguals/Hebrew task</i>   | 1.76                      | 0.19           | 0.03        | 1.38        | 2.14        | 9.05           | <i>p</i> < 0.001           | 2.00   |
| Le Clercq & al. (2017)<br><i>Normal version</i>              | 0.98                      | 0.24           | 0.06        | 0.50        | 1.46        | 4.02           | <i>p</i> < 0.001           | 1.90   |
| Le Clercq & al. (2017)<br><i>Short version</i>               | 0.52                      | 0.23           | 0.05        | 0.06        | 0.98        | 2.21           | <i>p</i> = 0.02            | 1.92   |
| Boerma & Blom (2017)<br><i>Monolinguals</i>                  | 2.15                      | 0.30           | 0.09        | 1.55        | 2.75        | 7.01           | <i>p</i> < 0.001           | 1.76   |
| Boerma & Blom (2017)<br><i>Bilinguals</i>                    | 1.68                      | 0.28           | 0.08        | 1.12        | 2.23        | 5.92           | <i>p</i> < 0.001           | 1.81   |
| Kazemi & Saeednia (2017)                                     | 3.35                      | 0.43           | 0.19        | 2.50        | 4.21        | 7.69           | <i>p</i> < 0.001           | 1.45   |
| dos Santos & Ferré (2018)<br><i>Monolinguals</i>             | 2.28                      | 0.51           | 0.26        | 1.26        | 3.29        | 4.40           | <i>p</i> < 0.001           | 1.27   |
| dos Santos & Ferré (2018)<br><i>Bilinguals</i>               | 1.10                      | 0.34           | 0.12        | 0.42        | 1.78        | 3.17           | <i>p</i> < 0.001           | 1.66   |
| Li'el & al. (2019)                                           | 1.61                      | 0.30           | 0.09        | 1.00        | 2.21        | 5.20           | <i>p</i> < 0.001           | 1.75   |
| McDonald & Oetting (2019)<br><i>Southern White English</i>   | 2.17                      | 0.41           | 0.17        | 1.36        | 2.98        | 5.24           | <i>p</i> < 0.001           | 1.50   |
| McDonald & Oetting (2019)<br><i>African American English</i> | 0.91                      | 0.24           | 0.06        | 0.42        | 1.40        | 3.68           | <i>p</i> < 0.001           | 1.89   |
| Bonifacci & al. (2020)                                       | 1.13                      | 0.29           | 0.08        | 0.54        | 1.71        | 3.81           | <i>p</i> < 0.001           | 1.78   |
| Pham & Ebert (2020)                                          | 1.09                      | 0.33           | 0.11        | 0.42        | 1.75        | 3.22           | <i>p</i> < 0.001           | 1.68   |
| <b>Random effects model</b>                                  | <b>1.54</b>               | <b>0.09</b>    | <b>0.00</b> | <b>1.37</b> | <b>1.72</b> | <b>17.22</b>   | <b><i>p</i> &lt; 0.001</b> |        |

\* *p* < 0.05. \*\* *p* < 0.01. \*\*\* *p* < 0.001.
