# Supplementary material
Source: publisher figshare collection journal article supplement (https://asha.figshare.com/articles/dataset/_/15152370)
Supplement: Supplementary file 3 [file 1]

**Supplemental Material S5.** Combination of NWRT and other measures.

| Study                            | Threshold | Sensitivity<br>(NWRT alone)   | Specificity<br>(NWRT alone)   | Other tasks                                    | Threshold                         | Sensitivity<br>(combined)     | Specificity<br>(combined)     |
|----------------------------------|-----------|-------------------------------|-------------------------------|------------------------------------------------|-----------------------------------|-------------------------------|-------------------------------|
| Thal et al. (2005)               | na        | 40%                           | 86%                           | Productive vocabulary                          | na                                | 65%                           | 86%                           |
| Bortolini et al.<br>(2006)       | na        | 82%                           | 82%                           | (a) Plural 3rd person                          | na                                | 82%                           | 100%                          |
|                                  |           |                               |                               | (b) Object clitics                             |                                   | 91%                           | 100%                          |
|                                  |           |                               |                               | Both a+b                                       |                                   | 91%                           | 91%                           |
| Oetting &<br>Cleveland<br>(2006) | na        | 56%                           | 92%                           | Nonverbal reasoning                            | na                                | 81%                           | 94%                           |
| Oetting et al.<br>(2008)         | 70%       | 56%                           | 92%                           | Nonverbal reasoning                            | 70%<br>91%                        | 81%                           | 94%                           |
| Thordardottir et<br>al. (2011)   | 82%       | 92%                           | 86%                           | Receptive vocabulary                           | .100                              | 98%                           | /                             |
| Paradis et al.<br>(2013)         | /         | /                             | /                             | Model 2 <sup>a</sup>                           | na                                | 91%                           | 92%                           |
| Armon-Lotem &<br>Meir (2016)     | .71       | Russian<br>monolingual<br>86% | Russian<br>monolingual<br>90% | Number recall                                  | .4                                | Russian<br>monolingual<br>57% | Russian<br>monolingual<br>90% |
|                                  |           |                               |                               | Sentence and number<br>recall                  | .4<br>.88                         | 50%                           | 100%                          |
|                                  |           |                               |                               | Number recall                                  | .4                                | Hebrew<br>monolingual<br>92%  | Hebrew<br>monolingual<br>86%  |
|                                  | .71       | Hebrew<br>monolingual<br>93%  | Hebrew<br>monolingual<br>66%  | Sentence and number<br>recall                  | .4<br>.88                         | 92%                           | 97%                           |
|                                  |           |                               |                               | Number recall                                  | .4                                | 61%                           | 92%                           |
|                                  |           |                               |                               | bilinguals <sup>c</sup><br>70% Russian<br>NWRT | bilinguals<br>76% Russian<br>NWRT | Number recall                 | .4                            |

| Study                   | Threshold | Sensitivity (NWRT alone) | Specificity (NWRT alone) | Other tasks                     | Threshold | Sensitivity (combined) | Specificity (combined) |
|-------------------------|-----------|--------------------------|--------------------------|---------------------------------|-----------|------------------------|------------------------|
|                         |           |                          |                          | Sentence and number recall      | .4<br>.88 | 59%                    | 95%                    |
|                         |           | 81% Hebrew NWRT          | 89% Hebrew NWRT          | Number recall                   | .4        | 67%                    | 85%                    |
|                         |           |                          |                          | Sentence and number recall      | .4<br>.88 | 67%                    | 95%                    |
| Boerma & Blom (2017)    | /         | /                        | /                        |                                 | na        | monolingual            | monolingual            |
|                         |           |                          |                          | Development index               |           | 94%                    | 93%                    |
|                         |           |                          |                          | Development index and narration |           | 94%                    | 93%                    |
|                         |           |                          |                          | Development index               |           | 90%                    | 87%                    |
|                         |           |                          |                          | Development index and narration |           | 97%                    | 97%                    |
| Bonifacci et al. (2020) | /         | /                        | /                        | Model 3A <sup>b</sup>           |           | 91.4%                  | 100%                   |

Note: N = 9. NWRT = Non-word repetition task

<sup>a</sup>The study includes different model variants with different percentages of sensitivity and specificity. We have mentioned only one of these models (among the best). Model 2 includes a parental questionnaire, a NWRT, a morphosyntactic production task, a narrative task.

<sup>b</sup>The study includes different model variants with different percentages of sensitivity and specificity. We have mentioned only one of these models (among the best). Model 3A includes: a receptive lexicon task, a parental questionnaire, a morphosyntactic comprehension task, a NWRT and a morphosyntactic production task.

<sup>c</sup>as categorized with bilingual norms.
