# Supplementary material
Source: publisher figshare collection journal article supplement (https://asha.figshare.com/articles/dataset/_/15152370)
Supplement: Supplementary file 4 [file 1]

**Supplemental Material S4. Correlations between NWRT and other measures.**

| Study                           | Other measures                      | Correlation                                                               |
|---------------------------------|-------------------------------------|---------------------------------------------------------------------------|
| Guiberson & Rodríguez (2015)    | Receptive and productive vocabulary | $r = 0.52, p < .001$                                                      |
| Horovov & Oetting (2004)        | Receptive and productive vocabulary | $p < 0.001$                                                               |
|                                 | Sentence/ syntax comprehension      | $p < 0.001$                                                               |
| Marini et al. (2017)            | Articulation                        | $r = .470, p < .001$                                                      |
|                                 | Productive vocabulary               | $r = .328, p < .001$                                                      |
|                                 | Semantic fluency                    | $r = .338, p < .001$                                                      |
|                                 | Receptive vocabulary                | $r = .268, p < .001$                                                      |
|                                 | Language development survey         | $r = .425, p < .001$                                                      |
|                                 | Family history of difficulties      | $r = -.199, p < .001$                                                     |
|                                 | Literacy questionnaire              | $r = .222, p < .001$                                                      |
| Chiat & Roy (2007)              | Receptive vocabulary                | $p < .001$                                                                |
| Stokes et al. (2013)            | Sentence repetition                 | $rs = .32, .37, .25, p > .05$                                             |
|                                 | Receptive and productive vocabulary | ns                                                                        |
|                                 | Nonverbal IQ                        | ns                                                                        |
| Thorardottir & Brandeker (2013) | French sentence repetition          | $r = 0.624, p < .001$                                                     |
|                                 | English sentence repetition         | $r = 0.555, p < .001$                                                     |
|                                 | English receptive vocabulary        | English NWRT: $r = 0.575, p < .001$<br>French NWRT: $r = 0.200, p = .177$ |
|                                 | French receptive vocabulary         | French NWRT: $r = 0.483, p = .001$<br>English NWRT: $r = 0.032, p = .833$ |
| De Almeida et al. (2017)        | Sentence repetition                 | $p < .0001$                                                               |
|                                 | Word repetition                     | DT: $rs = .249, p = .053$<br>DLD: $rs = .574, p = .008$                   |
|                                 | No-risk index                       | $rs = .466, p < .0001$                                                    |
| Paradis et al. (2013)           | Syntax                              | TD: $r = .242, p < .01$<br>DLD: $r = .412, p > .05$                       |
|                                 | Narration                           | TD: $r = .239, p < .01$<br>DLD: $r = .133, p > .05$                       |
|                                 | Receptive vocabulary                | TD: $r = .269, p < .01$<br>DLD: $r = .291, p > .05$                       |
| Dispaldro et al. (2013)         | Word repetition                     | TD: $r = 0.29, p = .262$                                                  |

| Study                       | Other measures                                    | Correlation                                                             |
|-----------------------------|---------------------------------------------------|-------------------------------------------------------------------------|
|                             |                                                   | DLD: $r = 0.83, p < .001$                                               |
| Petrucelli et al. (2012)    | Number recall/repetition                          | ns                                                                      |
| Gray (2003) <sup>a</sup>    | Number recall/repetition                          | TD: $r = 0.66, p < .001$<br>DLD: $r = 0.54, p < .01$                    |
|                             | Nonverbal task of cognitive abilities             | TD: $r = 0.26, p > .05$<br>DLD: $r = 0.09, p > .05$                     |
|                             | Morphosyntax et syntax                            | TD: $r = -0.57, p < .001$<br>DLD: $r = 0.49, p < .01$                   |
|                             | Phonology                                         | TD: $r = 0.63, p < .001$<br>DLD: $r = -0.05, p > .05$                   |
|                             | Receptive vocabulary                              | TD: $r = 0.38, p < 0.01$<br>DLD: $r = 0.45, p > .05$                    |
| Oetting & Cleveland (2006)  | Nonverbal reasoning                               | $r = .56, p < .01$                                                      |
|                             | Articulation task                                 | $r = .60, p < .01$                                                      |
| Oetting et al. (2008)       | Nonverbal reasoning                               | $r = .58, p < .05$                                                      |
| Thordardottir et al. (2011) | Receptive vocabulary                              | ns                                                                      |
|                             | Receptive test (vocabulary, syntax, morphosyntax) | correlated<br>correlated                                                |
|                             | Sentence repetition                               |                                                                         |
| Boerma et al. (2015)        | Nonverbal IQ                                      | ns                                                                      |
| De Almeida et al. (2017)    | Sentence repetition                               | $p < .0001$                                                             |
|                             | Word repetition                                   | TD: $r_s = .249, p = .053$<br>TDL: $r_s = .574, p = .008$               |
|                             | No-risk index                                     | $r_s = .466, p < .0001$                                                 |
| Tuller et al. (2018)        | Positive early development                        | German NWRT: $r = .493, p < .001$<br>French NWRT: $r = .512, p < .001$  |
|                             | Early exposure to L2                              | German NWRT: $r = -.398, p = .004$<br>French NWRT: $r = .086, p = .424$ |
|                             | Current L2 richness                               | German NWRT: $r = .189, p = .189$<br>French NWRT: $r = .030, p = .783$  |

Note:  $N = 17$ .

<sup>a</sup> These tasks were performed more than once; this table only shows the data for the best correlation results. For more details, please refer to the original article.

<sup>b</sup> The statistical details were not further specified.

\*  $p < 0.05$  \*\*  $p < 0.01$  \*\*\*  $p < 0.001$
